# Supplementary material
Source: PubMed Central journal article supplement (PMC4851993)
Supplement: supp_kwv308_kwv308supp.pdf [file supp_kwv308_kwv308supp.pdf]

**Web Table 1. Variables included in the lifetime ovulatory cycles (LOC) algorithms identified from the literature**

| Reference              | Algorithm | Age at menopause | Age at menarche | Duration of oral contraceptive use | Duration of non-contraceptive hormone use | Average cycle length | Duration of breastfeeding | Post-partum amenorrhea | Duration of pregnancy | Number of abortions | Number of miscarriages | Number of still births | Number of live births | Missed/irregular periods | Amenorrhic time    |
|------------------------|-----------|------------------|-----------------|------------------------------------|-------------------------------------------|----------------------|---------------------------|------------------------|-----------------------|---------------------|------------------------|------------------------|-----------------------|--------------------------|--------------------|
| Casagrande, 1979 (1)   | A         | Yes, available   | Yes, available  | Yes, available                     |                                           |                      |                           |                        | Yes, available        |                     |                        |                        | Yes, available        |                          |                    |
| Lavecchia, 1983 (2)    | B         | Yes, available   | Yes, available  | Yes, available                     |                                           |                      |                           |                        |                       | Yes, available      | Yes, available         |                        | Yes, available        |                          |                    |
| Pettersson, 1986 (3)   | C         | Yes, available   | Yes, available  |                                    |                                           |                      |                           |                        |                       |                     |                        |                        | Yes, available        |                          |                    |
| Cramer, 1995 (4)       | D         | Yes, available   | Yes, available  | Yes, available                     |                                           | Yes, available       |                           |                        | Yes, available        |                     |                        |                        |                       |                          |                    |
| Cramer, 1996 (5)       | E         | Yes, available   | Yes, available  | Yes, available                     |                                           | Yes, available       |                           |                        |                       |                     |                        |                        | Yes, available        |                          |                    |
| McPherson, 1996 (6)    | F         | Yes, available   | Yes, available  |                                    |                                           |                      |                           |                        |                       |                     |                        |                        | Yes, available        |                          |                    |
| Schildkraut, 1997 (7)  | G         | Yes, available   | Yes, available  | Yes, available                     |                                           |                      | Yes, available            |                        | Yes, available        |                     |                        |                        |                       |                          |                    |
| Webb, 1998 (8)         | H         | Yes, available   | Yes, available  | Yes, available                     |                                           | Yes, available       | Yes, available            |                        | Yes, available        |                     |                        |                        |                       |                          |                    |
| Siskind, 2000 (9)      | I         | Yes, available   | Yes, available  | Yes, available                     |                                           |                      |                           | Yes, not available     | Yes, available        |                     |                        |                        |                       |                          | Yes, not available |
| Moorman, 2002 (10)     | J         | Yes, available   | Yes, available  | Yes, available                     | Yes, available                            |                      | Yes, available            |                        | Yes, available        |                     |                        |                        |                       |                          |                    |
| Purdie, 2003 (11)      | K         | Yes, available   | Yes, available  | Yes, available                     |                                           | Yes, available       | Yes, available            |                        | Yes, available        |                     |                        |                        |                       |                          | Yes, not available |
| Tung, 2003 (12)        | L         | Yes, available   | Yes, available  | Yes, available                     |                                           | Yes, available       | Yes, available            |                        | Yes, available        |                     |                        |                        |                       |                          | Yes, not available |
| Odugogbe, 2005 (13)    | M         | Yes, available   | Yes, available  | Yes, available                     |                                           |                      | Yes, available            |                        |                       | Yes, available      |                        |                        | Yes, available        |                          |                    |
| Pelucchi, 2007 (14)    | N         | Yes, available   | Yes, available  | Yes, available                     |                                           | Yes, available       | Yes, available            |                        |                       | Yes, available      | Yes, available         |                        | Yes, available        |                          |                    |
| Terry, 2007 (15)       | O         | Yes, available   | Yes, available  | Yes, available                     |                                           | Yes, available       | Yes, available            |                        |                       | Yes, available      | Yes, available         | Yes, available         | Yes, available        |                          |                    |
| Schildkraut, 2008 (16) | P         | Yes, available   | Yes, available  | Yes, available                     | Yes, available                            | Yes, available       | Yes, available            | Yes, not available     | Yes, available        |                     |                        |                        |                       | Yes, not available       |                    |

|                           |   |                |                |                |  |  |                |  |  |  |  |  |                   |  |  |
|---------------------------|---|----------------|----------------|----------------|--|--|----------------|--|--|--|--|--|-------------------|--|--|
| Gates, 2010<br>(17)       | Q | Yes, available | Yes, available | Yes, available |  |  | Yes, available |  |  |  |  |  | Yes,<br>available |  |  |
| Kotsopolous,<br>2012 (28) | R | Yes, available | Yes, available | Yes, available |  |  | Yes, available |  |  |  |  |  | Yes,<br>available |  |  |

**Web Table 2. Algorithms for the lifetime ovulatory cycles (LOC) algorithms identified from the literature**

| Reference             | Formula                                                                                                                                                                                                                                                                                                                                                                                                                                                                                                                                                                                                                    |
|-----------------------|----------------------------------------------------------------------------------------------------------------------------------------------------------------------------------------------------------------------------------------------------------------------------------------------------------------------------------------------------------------------------------------------------------------------------------------------------------------------------------------------------------------------------------------------------------------------------------------------------------------------------|
| Casagrande, 1979 (1)  | "ovulatory age" = age at menopause - age at menarche - $\left( \text{number of live births} \times 12 \frac{\text{months}}{\text{birth}} + \text{number of months of incomplete pregnancies} + \text{number of months of oral contraceptive use} \right)$                                                                                                                                                                                                                                                                                                                                                                  |
| Lavecchia, 1983 (2)   | "ovulatory years" = age at menopause - age at menarche - number of full-term births $\times 12 \frac{\text{months}}{\text{birth}}$ - number of miscarriages/therapeutic abortions $\times 3 \frac{\text{months}}{\text{each}}$ - number of months of oral contraceptive use                                                                                                                                                                                                                                                                                                                                                |
| Pettersen, 1986 (3)   | "menstruation span, years" = age at menopause - age at menarche - number of births $\times 1.5$                                                                                                                                                                                                                                                                                                                                                                                                                                                                                                                            |
| Cramer, 1995 (4)      | "ovulatory cycles" = $\frac{\text{age at menopause} - \text{age at menarche} - (\text{years of being pregnant or using oral contraceptive use}) \times 365.25}{\text{average cycle length in 20's and 30's}}$                                                                                                                                                                                                                                                                                                                                                                                                              |
| Cramer, 1996 (5)      | "estimated ovulatory cycles" = $\frac{\text{current age} - \text{age at menarche} - \text{parity} + \text{years of oral contraceptive use}}{\text{average cycle length in adulthood (30's)} / 365}$                                                                                                                                                                                                                                                                                                                                                                                                                        |
| McPherson, 1996 (6)   | "years of ovulation" = age at menopause - age at menarche - months or years of pregnancy                                                                                                                                                                                                                                                                                                                                                                                                                                                                                                                                   |
| Schildkraut, 1997 (7) | "lifetime ovulatory cycles" = (index age <sup>a</sup> - age at menarche $\times 13$ ) - $\frac{(\text{number of months of breastfeeding} + \text{number of months pregnant} + \text{number of months of oral contraceptive use}) \times 13}{12}$                                                                                                                                                                                                                                                                                                                                                                           |
| Webb, 1998 (8)        | "ovulation years" = $\frac{\text{age at menopause} - \text{age at menarche} - \text{duration of oral contraceptive use} - \text{duration of being pregnant} - \text{duration of breastfeeding}}{\text{average cycle length} / 13}$                                                                                                                                                                                                                                                                                                                                                                                         |
| Siskind, 2000 (9)     | "ovulatory life per decade" = (age at menopause - age at menarche - duration of pregnancy - postpartum amenorrhea - duration of oral contraceptive use - amenorrhea due to other causes)<br>"ovulatory life per life" = weighted the results from each decade by the intensity of ovulation in that decade and then summed                                                                                                                                                                                                                                                                                                 |
| Moorman, 2002 (10)    | "lifetime ovulatory cycles" = age at menopause - age at menarche - months pregnant - months of oral contraceptive use - months of breastfeeding                                                                                                                                                                                                                                                                                                                                                                                                                                                                            |
| Purdie, 2003 (11)     | "ovulation years" = (age at menopause - age at menarche - duration of births and abortions - duration of oral contraceptive use - postpartum amenorrhoea - other periods of amenorrhoea) $\times$ average cycle length / 13                                                                                                                                                                                                                                                                                                                                                                                                |
| Tung, 2003 (12)       | "lifetime ovulatory cycles" = age at menopause - age at menarche - duration of pregnancy - duration of lactation - duration of oral contraceptive use - duration of amenorrhoea) $\times$ number of estimated cycles per year                                                                                                                                                                                                                                                                                                                                                                                              |
| Odukogbe, 2005 (13)   | "total ovulatory period, years" = age at menopause - age at menarche - $\frac{\left( \text{number of pregnancy} \times 40 \frac{\text{weeks}}{\text{pregnancy}} + \text{number of abortions} \times 14 \frac{\text{weeks}}{\text{abortion}} + \text{number of weeks of breastfeeding} \right)}{52 \text{ weeks/year}}$                                                                                                                                                                                                                                                                                                     |
| Pelucchi, 2007 (14)   | "lifetime ovulatory period" = age at menopause - age at menarche - number of pregnancy $\times \frac{9 \text{ months}}{\text{pregnancy}}$ - number of abortions $\times \frac{3 \text{ months}}{\text{abortion}}$ - months of oral contraceptive use - number of births $\times \frac{6 \text{ months of breastfeeding}}{\text{birth}}$ ...<br>$\times$ number of estimated cycles per year                                                                                                                                                                                                                                |
| Terry, 2007 (15)      | "lifetime ovulatory cycles" = $\frac{\text{age at menopause} - \text{age at menarche} - \left( \frac{\text{number of abortion/miscarriages/ectopic pregnancy} \times \frac{0.15 \text{ year}}{\text{abortion/miscarriages/ectopic pregnancy}} + \text{number of pre-term birth} \times \frac{0.65 \text{ year}}{\text{pre-term birth}} + \frac{\text{number of full-term birth} \times \frac{0.92 \text{ year}}{\text{full-term birth}} + \text{number of breastfed child} \times \frac{1 \text{ year}}{\text{breastfed child}} + \text{years of oral contraceptive use} \right)}{\text{average cycle length}} \times 365$ |

|                           |                                                                                                                                                                                                                                                                                       |
|---------------------------|---------------------------------------------------------------------------------------------------------------------------------------------------------------------------------------------------------------------------------------------------------------------------------------|
| Schildkraut,<br>2008 (16) | $\text{"total ovulatory cycles"} = \frac{\text{age at menopause} - \text{age at menarche} - \text{months of pregnancies} - \text{months of breastfeeding} - \text{months of postpartum amenorrhea} - \dots - \text{months of missed/irregular periods}}{\text{average cycle length}}$ |
| Gates, 2010<br>(17)       | $\text{"ovulatory years"} = \text{age at menopause} - \text{age at menarche} - \text{parity} \times \frac{1 \text{ year}}{\text{birth}} - \text{duration of breastfeeding}$                                                                                                           |
| Kotsopolous,<br>2012 (28) | $\text{"ovulatory cycles"} = 12 \text{ months} (\text{age at menopause} - \text{age at menarche} - \text{years of oral contraceptive use} - \text{parity} \times 0.77 - \text{years of breastfeeding})$                                                                               |

**Web Table 3. Pairwise correlation between LOC algorithms in combined controls from the Polish Cancer Study**

|   | A               | B             | C             | D             | E             | F             | G             | H             | J             | M             | N             | O             | Q             | R             |
|---|-----------------|---------------|---------------|---------------|---------------|---------------|---------------|---------------|---------------|---------------|---------------|---------------|---------------|---------------|
| A | 1.000<br>n=1181 |               |               |               |               |               |               |               |               |               |               |               |               |               |
| B | 0.999<br>n=1100 | 1.000<br>1191 |               |               |               |               |               |               |               |               |               |               |               |               |
| C | 0.936<br>n=1181 | 0.938<br>1191 | 1.000<br>1300 |               |               |               |               |               |               |               |               |               |               |               |
| D | 0.998<br>n=1181 | 0.997<br>1186 | 0.950<br>1277 | 1.000<br>1277 |               |               |               |               |               |               |               |               |               |               |
| E | 0.999<br>n=1181 | 0.998<br>1191 | 0.940<br>1282 | 0.997<br>1277 | 1.000<br>1282 |               |               |               |               |               |               |               |               |               |
| F | 0.934<br>n=1181 | 0.936<br>1191 | 1.000<br>1300 | 0.948<br>1277 | 0.938<br>1282 | 1.000<br>1300 |               |               |               |               |               |               |               |               |
| G | 0.934<br>n=1177 | 0.981<br>1181 | 0.877<br>1272 | 0.933<br>1272 | 0.934<br>1272 | 0.875<br>1272 | 1.000<br>1272 |               |               |               |               |               |               |               |
| H | 0.981<br>n=1177 | 0.981<br>1181 | 0.920<br>1272 | 0.979<br>1272 | 0.980<br>1272 | 0.917<br>1272 | 0.952<br>1272 | 1.000<br>1272 |               |               |               |               |               |               |
| J | 0.981<br>n=1177 | 0.981<br>1181 | 0.920<br>1272 | 0.979<br>1272 | 0.980<br>1272 | 0.917<br>1272 | 0.952<br>1272 | 1.000<br>1272 | 1.000<br>1272 |               |               |               |               |               |
| M | 0.936<br>n=1177 | 0.936<br>1117 | 0.952<br>1216 | 0.933<br>1199 | 0.936<br>1199 | 0.950<br>1216 | 0.914<br>1199 | 0.961<br>1199 | 0.961<br>1199 | 1.000<br>1216 |               |               |               |               |
| N | 0.997<br>n=1177 | 0.997<br>1186 | 0.945<br>1277 | 0.997<br>1272 | 0.994<br>1277 | 0.943<br>1277 | 0.937<br>1272 | 0.983<br>1272 | 0.983<br>1272 | 0.940<br>1199 | 1.000<br>1277 |               |               |               |
| O | 0.995<br>n=1177 | 0.996<br>1186 | 0.932<br>1277 | 0.992<br>1272 | 0.995<br>1277 | 0.929<br>1277 | 0.942<br>1272 | 0.989<br>1272 | 0.989<br>1272 | 0.946<br>1199 | 0.994<br>1277 | 1.000<br>1335 |               |               |
| Q | 0.978<br>n=1177 | 0.978<br>1186 | 0.907<br>1277 | 0.972<br>1272 | 0.980<br>1277 | 0.904<br>1277 | 0.949<br>1272 | 0.997<br>1272 | 0.997<br>1272 | 0.959<br>1199 | 0.977<br>1277 | 0.988<br>1277 | 1.000<br>1277 |               |
| R | 0.980<br>n=1177 | 0.980<br>1186 | 0.920<br>1277 | 0.978<br>1272 | 0.981<br>1277 | 0.918<br>1277 | 0.950<br>1272 | 0.999<br>1272 | 0.999<br>1272 | 0.961<br>1199 | 0.983<br>1277 | 0.988<br>1277 | 0.998<br>1277 | 1.000<br>1277 |

**Web Table 4. Pairwise correlation between LOC components and LOC algorithms in the combined controls from the Polish Cancer Study**

| Algorithm | Age at Menopause |             | Age at Menarche |             | Oral Contraceptive Use | No. of Live Births |             |
|-----------|------------------|-------------|-----------------|-------------|------------------------|--------------------|-------------|
|           | Continuous       | Categorical | Continuous      | Categorical | Categorical            | Continuous         | Categorical |
| C         | 0.8855           | 0.8273      | -0.2731         | -0.2644     | -0.1304                | -0.0394            | -0.0392     |
| D         | 0.8505           | 0.7962      | -0.2745         | -0.268      | -0.2797                | -0.1193            | -0.1175     |
| G         | 0.7934           | 0.7198      | -0.2438         | -0.2351     | -0.2976                | -0.173             | -0.1721     |
| M         | 0.8198           | 0.7682      | -0.2652         | -0.2565     | -0.1171                | -0.1926            | -0.1914     |
| R         | 0.8071           | 0.7582      | -0.2547         | -0.2466     | -0.2957                | -0.1832            | -0.182      |

**Web Table 5. Selected characteristics of ovarian and endometrial cancer case and controls in the Polish Cancer Study**

|                                           | Endometrial Cancer |     |                         |     | Ovarian Cancer     |     |                         |     |
|-------------------------------------------|--------------------|-----|-------------------------|-----|--------------------|-----|-------------------------|-----|
|                                           | Cases<br>(n = 532) |     | Controls<br>(n = 1,286) |     | Cases<br>(n = 302) |     | Controls<br>(n = 1,356) |     |
|                                           | No.                | %   | No.                     | %   | No.                | %   | No.                     | %   |
| <b>Age, years</b>                         |                    |     |                         |     |                    |     |                         |     |
| <40                                       | 0                  | 0%  | 0                       | 0%  | 1                  | 0%  | 0                       | 0%  |
| 40–49                                     | 49                 | 9%  | 49                      | 4%  | 84                 | 28% | 62                      | 5%  |
| 50–59                                     | 168                | 32% | 517                     | 40% | 84                 | 28% | 553                     | 41% |
| 60–69                                     | 223                | 42% | 496                     | 39% | 93                 | 31% | 514                     | 38% |
| ≥70                                       | 92                 | 17% | 224                     | 17% | 40                 | 13% | 227                     | 17% |
| Missing                                   | 0                  |     | 0                       |     | 0                  |     | 0                       |     |
| <b>Age at menopause</b>                   |                    |     |                         |     |                    |     |                         |     |
| <45                                       | 34                 | 7%  | 113                     | 9%  | 39                 | 13% | 112                     | 9%  |
| 45–49                                     | 112                | 22% | 358                     | 29% | 106                | 37% | 358                     | 27% |
| 50–54                                     | 253                | 49% | 586                     | 47% | 112                | 39% | 656                     | 50% |
| ≥55                                       | 115                | 22% | 181                     | 15% | 32                 | 11% | 183                     | 14% |
| Missing                                   | 18                 |     | 48                      |     | 13                 |     | 47                      |     |
| <b>Age at menarche</b>                    |                    |     |                         |     |                    |     |                         |     |
| <13                                       | 149                | 28% | 264                     | 21% | 82                 | 27% | 279                     | 21% |
| 13                                        | 132                | 25% | 291                     | 23% | 69                 | 23% | 309                     | 23% |
| 14                                        | 128                | 24% | 343                     | 27% | 91                 | 30% | 363                     | 27% |
| 15                                        | 56                 | 11% | 141                     | 11% | 30                 | 10% | 148                     | 11% |
| ≥16                                       | 64                 | 12% | 228                     | 18% | 28                 | 9%  | 236                     | 18% |
| Missing                                   | 3                  |     | 19                      |     | 2                  |     | 21                      |     |
| <b>Duration of oral contraceptive use</b> |                    |     |                         |     |                    |     |                         |     |
| Never user                                | 502                | 95% | 1,198                   | 95% | 277                | 93% | 1,260                   | 94% |
| <2 years                                  | 11                 | 2%  | 29                      | 2%  | 7                  | 2%  | 33                      | 2%  |
| 2–4 years                                 | 9                  | 2%  | 21                      | 2%  | 9                  | 3%  | 24                      | 2%  |
| ≥5 years                                  | 6                  | 1%  | 19                      | 1%  | 5                  | 2%  | 19                      | 1%  |
| Missing                                   | 4                  |     | 19                      |     | 4                  |     | 20                      |     |
| <b>Duration of breastfeeding</b>          |                    |     |                         |     |                    |     |                         |     |
| Never breastfed                           | 80                 | 18% | 195                     | 17% | 54                 | 22% | 204                     | 17% |
| <12 months                                | 210                | 48% | 583                     | 51% | 134                | 54% | 630                     | 52% |
| 12–23 months                              | 110                | 25% | 231                     | 20% | 43                 | 17% | 238                     | 20% |
| ≥24 months                                | 34                 | 8%  | 131                     | 11% | 18                 | 7%  | 137                     | 11% |
| Missing                                   | 98                 |     | 146                     |     | 53                 |     | 147                     |     |

*(Table continues)*

No. of pregnancies

|         |     |     |     |     |    |     |     |     |
|---------|-----|-----|-----|-----|----|-----|-----|-----|
| 0       | 65  | 12% | 100 | 8%  | 42 | 14% | 102 | 8%  |
| 1       | 92  | 17% | 193 | 15% | 75 | 25% | 199 | 15% |
| 2       | 154 | 29% | 402 | 31% | 81 | 27% | 423 | 31% |
| 3       | 112 | 21% | 268 | 21% | 52 | 17% | 287 | 21% |
| ≥4      | 109 | 20% | 323 | 25% | 52 | 17% | 345 | 25% |
| Missing | 0   |     | 0   |     | 0  |     | 0   |     |

No. of births

|         |     |     |     |     |     |     |     |     |
|---------|-----|-----|-----|-----|-----|-----|-----|-----|
| 0       | 100 | 19% | 149 | 12% | 54  | 18% | 149 | 11% |
| 1       | 172 | 32% | 380 | 30% | 124 | 41% | 412 | 30% |
| 2       | 214 | 40% | 561 | 44% | 105 | 35% | 590 | 44% |
| ≥3      | 46  | 9%  | 196 | 15% | 19  | 6%  | 205 | 15% |
| Missing | 0   |     | 0   |     | 0   |     | 0   |     |

---



## WEB REFERENCES

1. Casagrande JT, Louie EW, Pike MC, et al. "Incessant ovulation" and ovarian cancer. *Lancet* 1979;2(8135):170–173.
2. La Vecchia C, Franceschi S, Gallus G, et al. Incessant ovulation and ovarian cancer: a critical approach. *Int J Epidemiol* 1983;12(2):161–164.
3. Pettersson B, Adami HO, Bergstrom R, et al. Menstruation span—a time-limited risk factor for endometrial carcinoma. *Acta Obstet Gynecol Scand* 1986;65(3):247–255.
4. Cramer DW, Xu H, Harlow BL. Does "incessant" ovulation increase risk for early menopause? *Am J Obstet Gynecol* 1995;172(2 Pt 1):568–573.
5. Cramer DW, Xu H. Predicting age at menopause. *Maturitas* 1996;23(3):319–326.
6. McPherson CP, Sellers TA, Potter JD, et al. Reproductive factors and risk of endometrial cancer. The Iowa Women's Health Study. *Am J Epidemiol* 1996;143(12):1195–1202.
7. Schildkraut JM, Bastos E, Berchuck A. Relationship between lifetime ovulatory cycles and overexpression of mutant p53 in epithelial ovarian cancer. *J Natl Cancer Inst* 1997;89(13):932–938.
8. Webb PM, Green A, Cummings MC, et al. Relationship between number of ovulatory cycles and accumulation of mutant p53 in epithelial ovarian cancer. *J Natl Cancer Inst* 1998;90(22):1729–1734.
9. Siskind V, Green A, Bain C, et al. Beyond ovulation: oral contraceptives and epithelial ovarian cancer. *Epidemiology* 2000;11(2):106–110.
10. Moorman PG, Schildkraut JM, Calingaert B, et al. Ovulation and ovarian cancer: a comparison of two methods for calculating lifetime ovulatory cycles (United States). *Cancer Causes Control* 2002;13(9):807–811.
11. Purdie DM, Bain CJ, Siskind V, et al. Ovulation and risk of epithelial ovarian cancer. *Int J Cancer* 2003;104(2):228–232.
12. Tung KH, Goodman MT, Wu AH, et al. Reproductive factors and epithelial ovarian cancer risk by histologic type: a multiethnic case-control study. *Am J Epidemiol* 2003;158(7):629–638.
13. Odukogbe AA, Adebamowo CA, Adeniji AO, et al. Total ovulating period: any contribution to ovarian carcinogenesis? *Afr J Med Med Sci* 2005;34(3):307–309.
14. Pelucchi C, Galeone C, Talamini R, et al. Lifetime ovulatory cycles and ovarian cancer risk in 2 Italian case-control studies. *Am J Obstet Gynecol* 2007;196(1):83, e81–87.
15. Terry KL, Titus-Ernstoff L, McKolanis JR, et al. Incessant ovulation, mucin 1 immunity, and risk for ovarian cancer. *Cancer Epidemiol Biomarkers Prev* 2007;16(1):30–35.
16. Schildkraut JM, Moorman PG, Bland AE, et al. Cyclin E overexpression in epithelial ovarian cancer characterizes an etiologic subgroup. *Cancer Epidemiol Biomarkers Prev* 2008;17(3):585–593.
17. Gates MA, Rosner BA, Hecht JL, et al. Risk factors for epithelial ovarian cancer by histologic subtype. *Am J Epidemiol* 2010;171(1):45–53.
18. Kotsopoulos J, Lubinski J, Lynch HT, et al. Oophorectomy after Menopause and the Risk of Breast Cancer in BRCA1 and BRCA2 Mutation Carriers. *Cancer Epidemiol Biomarkers Prev* 2012;21(7):1089–1096.
